# Supplementary material for: Wide bandgap copolymers with asymmetric side chains for efficient organic solar cells
Source: Royal Society of Chemistry journal article supplement (doi:10.1039/d4tc00189c), 2024-01-01
Supplement: d4tc00189c1.pdf [file d4tc00189c1.pdf]

## Electronic Supplementary Information

### Wide bandgap copolymers with asymmetric side chains for efficient organic solar cells

Zicheng Tao, Yi Li, Wenxiong Shen, Huiting Fu, Yunlong Ma and Qingdong Zheng\*

#### Reagents and instruments

All commercial reagents were used without any further treatment unless specifically stated. Y6 was purchased from Solarmer Materials Inc. Compounds **6** was purchased from SunaTech Inc. The other reagents were purchased from Adamas-Beta Ltd., Sigma-Aldrich Inc., J&K Scientific Ltd., and Aladdin-Reagent Inc. <sup>1</sup>H NMR spectra were obtained using a Bruker AVANCE-400 spectrometer. Photoluminescence spectra were taken on an Edinburgh Instrument FLS 920. UV-vis absorption spectra were obtained on a Lambda 365 spectrophotometer. The AFM images of the active layers were acquired by a Dimension Icon AFM. The thickness of films was measured by a Bruker Dektak XT surface profilometer. Cyclic voltammetry was performed in a solution of tetra-*n*-butylammonium hexafluorophosphate (0.1 M) in acetonitrile on a CHI 604E electrochemical workstation with a three-electrode system at a scan rate of 100 mV s<sup>-1</sup>. The polymer donors were deposited on a Pt plate electrode by dipping the electrode into the corresponding solutions and then dried under the ambient condition. Pt wire and Ag/AgNO<sub>3</sub> were used as the counter electrode and reference electrode, respectively.

#### Synthesis

Compounds **1a**, **b** and **3** were prepared according to the reported procedures.<sup>S1-S3</sup>

#### Synthesis of compound 2a

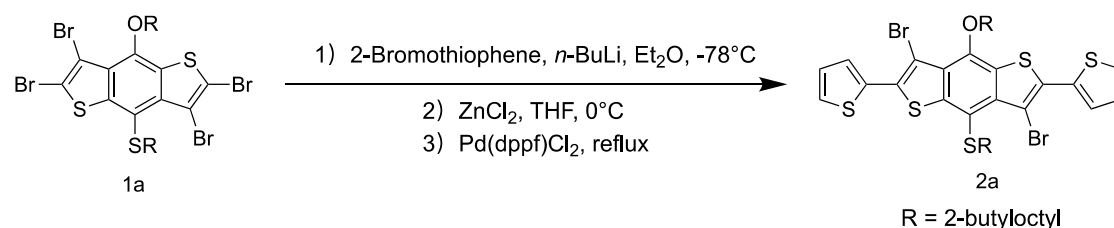

To the diethyl ether solution of 2-bromothiophene (0.64 g, 3.93 mmol) was added *n*-BuLi (1.8 mL, 4.49 mmol) dropwise at -78 °C under N<sub>2</sub> atmosphere, and then the temperature was maintained for 1 h. ZnCl<sub>2</sub> solution (4.5 mL, 4.49 mmol) was subsequently added, followed by stirring at 0 °C for another 1 h. After that, compound 1 (0.5 g, 0.56 mmol) and dichloro[1,1'-bis(diphenylphosphino)ferrocene]palladium(II) (0.041 g, 0.056 mmol) were added and then the mixture was heated to reflux for 12 h. Finally, saturated aqueous NH<sub>4</sub>Cl solution was used to quench the reaction. The organic layer was then extracted by water and diethyl ether, washed by brine, dried over anhydrous MgSO<sub>4</sub> and filtrated. By using column chromatography on silica gel (petroleum ether as eluent), compound 2 was successfully obtained as a yellow solid (0.37 g, 73%). <sup>1</sup>H NMR (400 MHz, CDCl<sub>3</sub>) δ 7.67 (ddd, *J* = 6.6, 3.7, 1.2 Hz, 2H), 7.51 (ddd, *J* = 9.5, 5.1, 1.2 Hz, 2H), 7.17 (dt, *J* = 5.1, 3.8 Hz, 2H), 4.11 (d, *J* = 6.5 Hz, 2H), 2.97 (d, *J* = 5.9 Hz, 2H), 2.19 – 2.08 (m, 1H), 1.73 – 1.60 (m, 2H), 1.54 – 1.17 (m, 34H), 1.03 – 0.73 (m, 13H). HRMS (MALDI) *m/z*: calcd. for C<sub>42</sub>H<sub>56</sub>O<sub>2</sub>Br<sub>2</sub>S<sub>4</sub>, 895.1374; found, 895.1360.

### Synthesis of compound 2b

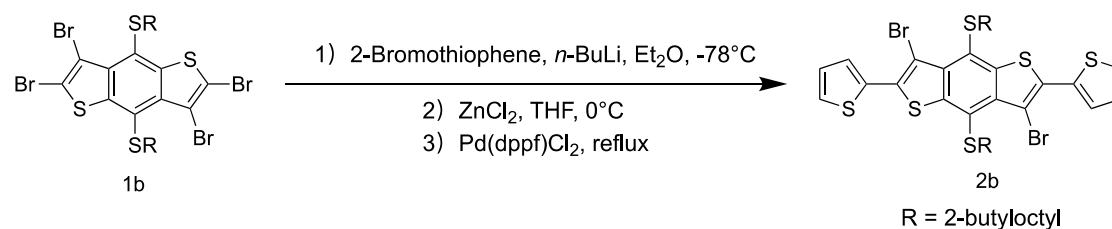

**2b** was synthesized similarly as described for **2a** (75.0% yield). <sup>1</sup>H NMR (400 MHz, CDCl<sub>3</sub>) δ 7.71 (dd, *J* = 3.7, 1.2 Hz, 2H), 7.52 (dd, *J* = 5.1, 1.2 Hz, 2H), 7.18 (dd, *J* = 5.1, 3.7 Hz, 2H), 3.00 (d, *J* = 6.0 Hz, 4H), 1.69 (m, 3H), 1.55 – 1.14 (m, 35H), 0.93 – 0.80 (m, 13H). HRMS (MALDI) *m/z*: calcd. for C<sub>42</sub>H<sub>56</sub>Br<sub>2</sub>S<sub>6</sub>, 911.1146; found, 911.1188.

### Synthesis of compound 4a

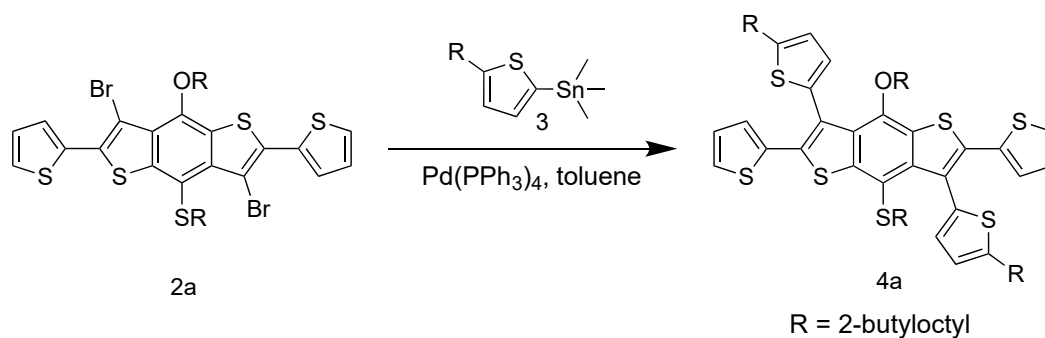

Under N<sub>2</sub> atmosphere, compound 3 (0.37 g, 0.89 mmol) and Pd(PPh<sub>3</sub>)<sub>4</sub> (0.026 g, 0.022 mmol) were added to the mixture of toluene (8 mL) and compound 2a (0.2 g, 0.22 mmol), followed by refluxing for 12 h. The crude product was then extracted by water and CH<sub>2</sub>Cl<sub>2</sub>, washed by brine, dried over anhydrous MgSO<sub>4</sub> and filtrated. By using column chromatography on silica gel (petroleum ether as eluent), compound 4a was successfully obtained as a yellow oil (0.27 g, 98%). <sup>1</sup>H NMR (400 MHz, CDCl<sub>3</sub>) δ 7.31 (dd, *J* = 3.8, 1.2 Hz, 1H), 7.24 (ddd, *J* = 8.6, 5.1, 1.2 Hz, 3H), 7.01 – 6.92 (m, 4H), 6.82 (dd, *J* = 7.3, 3.4 Hz, 2H), 3.72 (d, *J* = 6.5 Hz, 2H), 2.86 (dd, *J* = 13.3, 6.7 Hz, 4H), 2.70 (m, 2H), 1.72 (s, 2H), 1.51 – 1.17 (m, 71H), 0.92 (m, 27H). HRMS (MALDI) *m/z*: calcd. for C<sub>74</sub>H<sub>110</sub>OS<sub>7</sub>, 1239.6674; found, 1239.6727.

### Synthesis of compound 4b

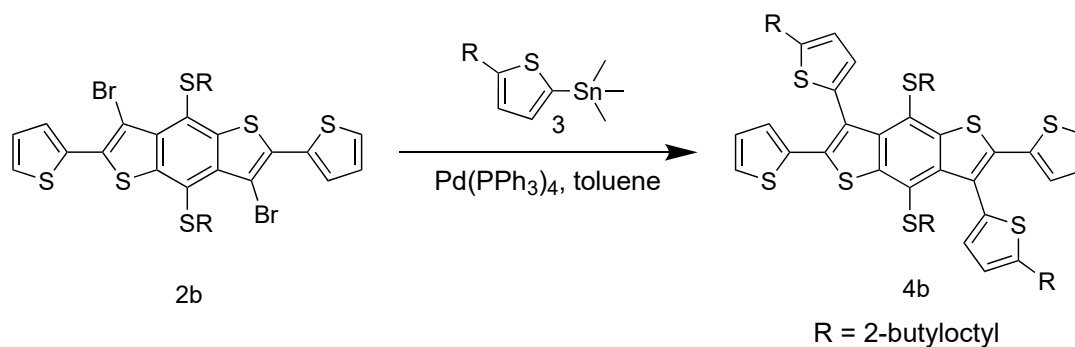

**4b** was synthesized similarly as described for **4a** (88% yield). <sup>1</sup>H NMR (400 MHz, CDCl<sub>3</sub>) δ 7.32 (dd, *J* = 3.7, 1.2 Hz, 2H), 7.23 (dd, *J* = 5.1, 1.2 Hz, 2H), 6.96 (dd, *J* = 5.1, 3.7 Hz, 2H), 6.91 (d, *J* = 3.3 Hz, 2H), 6.80 (d, *J* = 3.4 Hz, 2H), 2.86 (d, *J* = 6.7 Hz, 4H), 2.71 (m, 4H), 1.69 (m, 2H), 1.50 – 1.10 (m, 86H), 0.89 (m, 30H). HRMS (MALDI) *m/z*: calcd. for C<sub>74</sub>H<sub>110</sub>S<sub>8</sub>, 1255.6446; found, 1255.6482.

### Synthesis of compound 5a

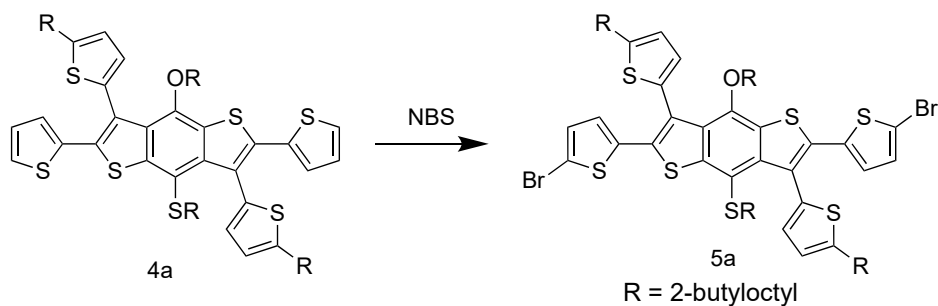

To the mixture of compound **4a** (0.1 g, 0.08 mmol) and anhydrous tetrahydrofuran (10 mL) was added NBS (0.057 g, 0.56 mmol) at 0 °C in the dark. After the mixture was stirred at room temperature for 12 h, saturated aqueous Na<sub>2</sub>SO<sub>3</sub> solution was injected to the mixture to quench the reaction. The organic layer was then extracted by water and CH<sub>2</sub>Cl<sub>2</sub>, washed by brine, dried over anhydrous MgSO<sub>4</sub> and filtrated. By using column chromatography on silica gel (petroleum ether as eluent), compound **5a** was successfully obtained as a yellow oil (0.08 g, 71%). <sup>1</sup>H NMR (400 MHz, CDCl<sub>3</sub>) δ 7.10 (d, *J* = 4.0 Hz, 1H), 7.05 (d, *J* = 4.0 Hz, 1H), 6.98 – 6.90 (m, 4H), 6.83 (dd, *J* = 6.4, 3.4 Hz, 2H), 3.69 (d, *J* = 6.4 Hz, 2H), 2.88 (dd, *J* = 13.1, 6.6 Hz, 4H), 2.67 (s, 2H), 1.73 (s, 2H), 1.50 – 1.16 (m, 61H), 1.02 – 0.81 (m, 23H). HRMS (MALDI) *m/z*: calcd. for C<sub>74</sub>H<sub>108</sub>Br<sub>2</sub>OS<sub>7</sub>, 1395.4885; found, 1395.3967.

### Synthesis of compound **5b**

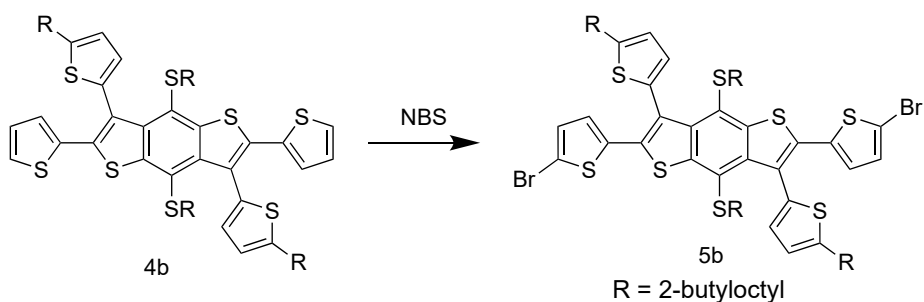

Compound **5b** was synthesized similarly as described for **5a** (74.0% yield). <sup>1</sup>H NMR (400 MHz, CDCl<sub>3</sub>) δ 7.12 (d, *J* = 4.0 Hz, 2H), 6.91 (t, *J* = 3.9 Hz, 4H), 6.81 (d, *J* = 3.4 Hz, 2H), 2.87 (d, *J* = 6.6 Hz, 4H), 2.69 (s, 4H), 1.70 (d, *J* = 6.7 Hz, 2H), 1.50 – 1.13 (m, 70H), 1.00 – 0.81 (m, 26H). HRMS (MALDI) *m/z*: calcd. for C<sub>74</sub>H<sub>108</sub>Br<sub>2</sub>S<sub>8</sub>, 1410.4578; found, 1410.4554.

### Synthesis of POS

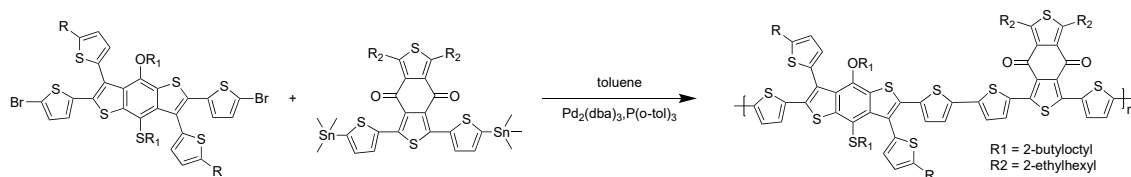

In a dry 20 mL thick-wall pressure bottle, compound **5a** (0.06 g, 0.0433 mmol), compound **6** (0.04g, 0.0433 mmol), Pd<sub>2</sub>(dba)<sub>3</sub> (0.003 g, 0.0035 mmol) and P(*o*-tol)<sub>3</sub> (0.005 g, 0.0175mmol), 1 mL of toluene was added to dissolve the mixture. Then the mixture was purged with nitrogen gas for 5 min. The pressure bottle was sealed and placed in an oil bath and heated to 130 °C for 80 h. The reactant was cooled to room temperature, and then the polymer was precipitated by addition of 200 mL of methanol. The precipitate was filtered off, and then subjected to Soxhlet extraction with methanol, acetone, hexane, and dichloromethane, respectively. The collected dichloromethane solution was concentrated and precipitated in methanol to get a red solid POS (0.041 g, 52% yield,  $M_n=51.9$  kDa, PDI =2.11). <sup>1</sup>H NMR (400 MHz, CDCl<sub>3</sub>) δ 7.20 – 6.58 (m, 12H), 3.69 (s, 2H), 3.33 (s, 4H), 2.87 (s, 4H), 2.68 (s, 2H), 1.77 (s, 6H), 1.53 – 1.12 (m, 90H), 0.91 m, 42H).

### Synthesis of PSS

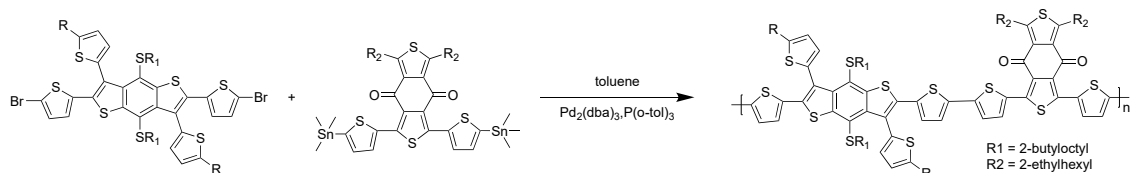

**PSS** was synthesized similarly as described for **POS** (74% yield,  $M_n=58.8$  kDa, PDI =2.48). <sup>1</sup>H NMR (400 MHz, CDCl<sub>3</sub>) δ 7.20 – 6.69 (m, 12H), 3.34 (s, 4H), 2.90 (s, 4H), 2.72 (s, 4H), 1.76 (s, 5H), 1.29 (s, 82H), 0.91 (s, 41H).

### OSC device fabrication and characterization

OSCs were fabricated with a conventional device architecture of ITO/PEDOT:PSS/active layer/PDIN/Ag. ITO glass was ultrasonically cleaned with detergent, deionized water, acetone and isopropanol for 15 min each, then dried overnight in an oven, and subsequently subjected to UV-O<sub>3</sub> treatment for 15 min prior to use. To get the

PEDOT:PSS film on ITO glass, a filtered PEDOT:PSS solution (Baytron PVP AI 4083 from H. C. Starck) was spin-coated onto the cleaned ITO substrates at 3500 rpm, followed by baking at 140 °C for 15 min in air. Subsequently, the PEDOT:PSS-coated ITO glass substrates were transferred into a N<sub>2</sub>-filled glovebox. The overall concentration of polymer donor:Y6 is fixed at 20 mg mL<sup>-1</sup> in chloroform which was subsequently spin-coated (3500 rpm, 30 s) on the PEDOT:PSS layer to form the active layer (~110 nm). Then the active layer was annealed at 85 °C for 5 min. Subsequently, 10 nm of PDIN layer was spin-coated (3300 rpm, 30 s) from the PDIN methanol solution (2.0 mg/mL and 0.3% v/v CH<sub>3</sub>COOH). Finally, 100 nm of Ag layer was deposited onto the active layer by shadow masks. The active area for the devices was fixed at 4 mm<sup>2</sup>. Device characterization was performed under AM 1.5G irradiation (100 mW cm<sup>-2</sup>) using a solar simulator with the model of SS-X50 (EnliTech). The *J-V* curves were obtained by using a Keithley 2440 source measurement unit. EQE spectra were measured on a Newport EQE measuring system.

### **Fabrication and characterization of hole- and electron-only devices**

Hole- and electron- mobilities were measured by using the space charge limited current (SCLC) method. Hole-only devices were fabricated with an architecture of ITO/PEDOT:PSS/active layer/MoO<sub>3</sub>/Ag, while electron-only devices were constructed with an architecture of ITO/ZnO/active layer/Ca/Al. The active layers were prepared using the same method as that used for the best-performance PSCs. Device areas were fixed at 4 mm<sup>2</sup>. The current density (*J*) was measured by a Keithley 2440 source measurement unit. The SCLC hole- and electron-mobilities were calculated according to the following equation:

$$J = \frac{9\varepsilon_0\varepsilon_r\mu V^2}{8L^3}$$

Where *J* is the current density (A m<sup>-2</sup>),  $\varepsilon_0$  is the free-space permittivity ( $8.85 \times 10^{-12}$  F m<sup>-1</sup>),  $\varepsilon_r$  is the relative dielectric constant of the active layer material, usually 2-4 for organic semiconductors (herein we used a relative dielectric constant of 3),  $\mu$  is the hole- or electron-mobility, *V* is the voltage drop across the SCLC device ( $V = V_{\text{appl}} - V_{\text{bi}}$ ,

where  $V_{\text{appl}}$  is the applied voltage to the device and  $V_{\text{bi}}$  is the built-in voltage. Due to the difference in the work function of two electrodes in the hole- and electron-only devices, the  $V_{\text{bi}}$  values are 0.5 and 0.7 V, respectively), and  $L$  is the thickness of active layer. The thickness of film was determined by a Bruker Dektak XT surface profilometer. The hole- or electron-mobility can be calculated from the slope of the  $J^{1/2}$ - $V$  curves.

### GIWAXS characterization

All samples for the GIWAXS measurements were prepared on the PEDOT:PSS-coated Si substrates. The 2D GIWAXS patterns were acquired using a XEUSS SAXS/WAXS system at Fujian Institute of Research on the Structure of Matter, Chinese Academy of Sciences. The wavelength of the X-ray beam is 1.54 Å, and the incident angle was set as 0.2°. Scattered X-rays were detected by using a Dectris Pilatus 300 K photon counting detector. The coherence length ( $CCL$ ) was estimated by the Scherrer equation:  $CCL = 2\pi k / \text{FWHM}$ , where FWHM is the full width at half-maximum of the peak and  $k$  is a shape factor (0.9 was used here).

**Table. S1** Photovoltaic parameters of PSCs based on POS:Y6.<sup>a</sup>

| DIO (vol%) | Annealing temperature [°C] | Annealing time [min] | $V_{\text{oc}}$ [V] | $J_{\text{sc}}$ [mA cm <sup>-2</sup> ] | FF [%] | PCE <sup>b</sup> [%] |
|------------|----------------------------|----------------------|---------------------|----------------------------------------|--------|----------------------|
| 0.8        | 85                         | 5                    | 0.845               | 25.64                                  | 60.88  | 13.20 (12.86 ± 0.30) |
| 1.0        | 85                         | 5                    | 0.820               | 26.85                                  | 68.20  | 15.02 (14.83 ± 0.16) |
| 1.2        | 85                         | 5                    | 0.797               | 26.95                                  | 62.95  | 13.52 (13.39 ± 0.12) |
| 1.0        | 80                         | 5                    | 0.820               | 25.14                                  | 68.18  | 13.98 (13.61 ± 0.42) |
| 1.0        | 90                         | 5                    | 0.814               | 27.01                                  | 59.37  | 13.05 (12.55 ± 0.36) |
| 1.0        | 85                         | 3                    | 0.818               | 26.30                                  | 68.38  | 14.78 (14.50 ± 0.15) |
| 1.0        | 85                         | 7                    | 0.822               | 26.55                                  | 68.20  | 14.80 (14.53 ± 0.52) |

<sup>a</sup> The POS:Y6 blends with 1:1.3 weight ratio were dissolved in chloroform. <sup>b</sup> In parentheses are averaged values with standard deviations based on 8 devices.

**Table. S2** Summarized parameters of the ordered structures based on pure donor films

and two blends.

| Samples | $\pi - \pi$ stacking       |                                                | Lamellar stacking |                                                |
|---------|----------------------------|------------------------------------------------|-------------------|------------------------------------------------|
|         | $d_{\pi}$ (Å) <sup>a</sup> | CCL (Å) <sup>b</sup> (FWHM (Å <sup>-1</sup> )) | $d_L$ (Å)         | CCL (Å) <sup>b</sup> (FWHM (Å <sup>-1</sup> )) |
| POS     | 3.57                       | 13.19 (0.429)                                  | 20.12             | 75.36 (0.075)                                  |
| PSS     | 3.62                       | 12.99 (0.435)                                  | 20.43             | 68.92 (0.082)                                  |
| POS:Y6  | 3.58                       | 14.07 (0.401)                                  | 19.94             | 81.91 (0.069)                                  |
| PSS:Y6  | 3.63                       | 8.34 (0.677)                                   | 22.68             | 74.36 (0.076)                                  |

<sup>a</sup>  $d_{\pi}$  was calculated from the (010) diffraction peak along the  $q_z$  axis; <sup>b</sup> CCL was estimated from the Scherrer equation ( $CCL=2\pi k/FWHM$ ), in which  $k$  is the Scherrer factor and FWHM is the full-width at the half-maximum of the peak; <sup>c</sup>  $d_L$  was calculated from (100) diffraction peak along the  $q_{xy}$  axis.

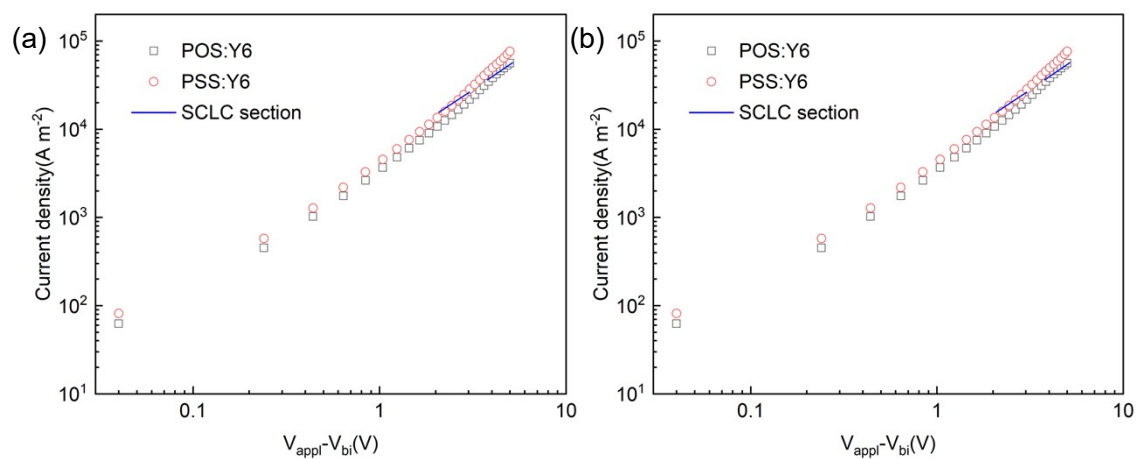

**Fig S1.** (a)  $J$ - $V$  plots for hole-only and (b) electron-only devices based on POS:Y6 and PSS:Y6.



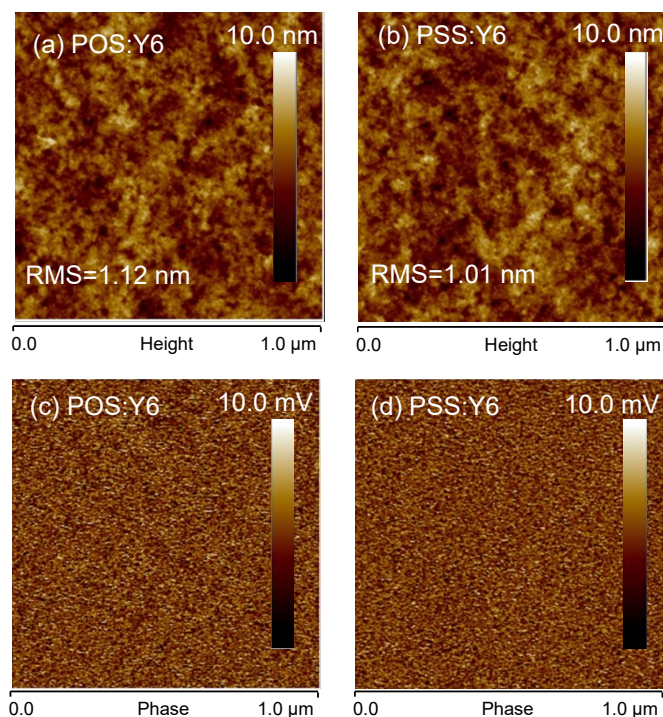

**Fig S2.** (a and b) AFM height images and (c and d) phase images of POS:Y6- and PSS:Y6-based active layers. The scan size is  $1.0 \mu\text{m} \times 1.0 \mu\text{m}$ .

### Theoretical calculation

The molecular geometries are optimized by Gaussian 16 at B3LYP/6-31G\* level. Energy levels and charge density distribution are calculated at the B3LYP/6-311G\*\* level. The side-chains were replaced by isobutyl groups for simplicity.

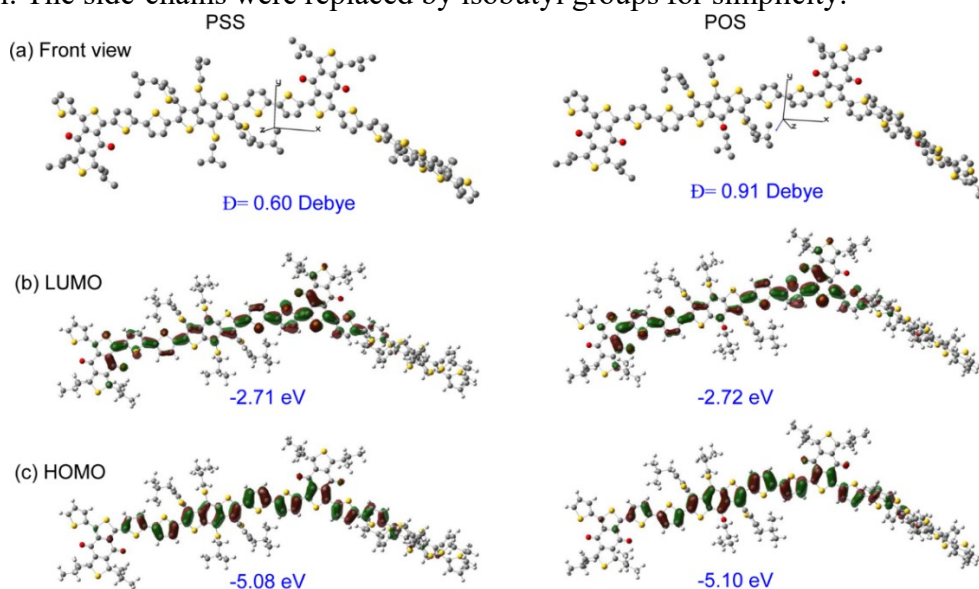

**Fig. S3.** (a) Optimized geometries with dipole moments ( $\text{D}$ ) and (b-c) frontier molecular orbitals for PSS and POS calculated from two repeating units.

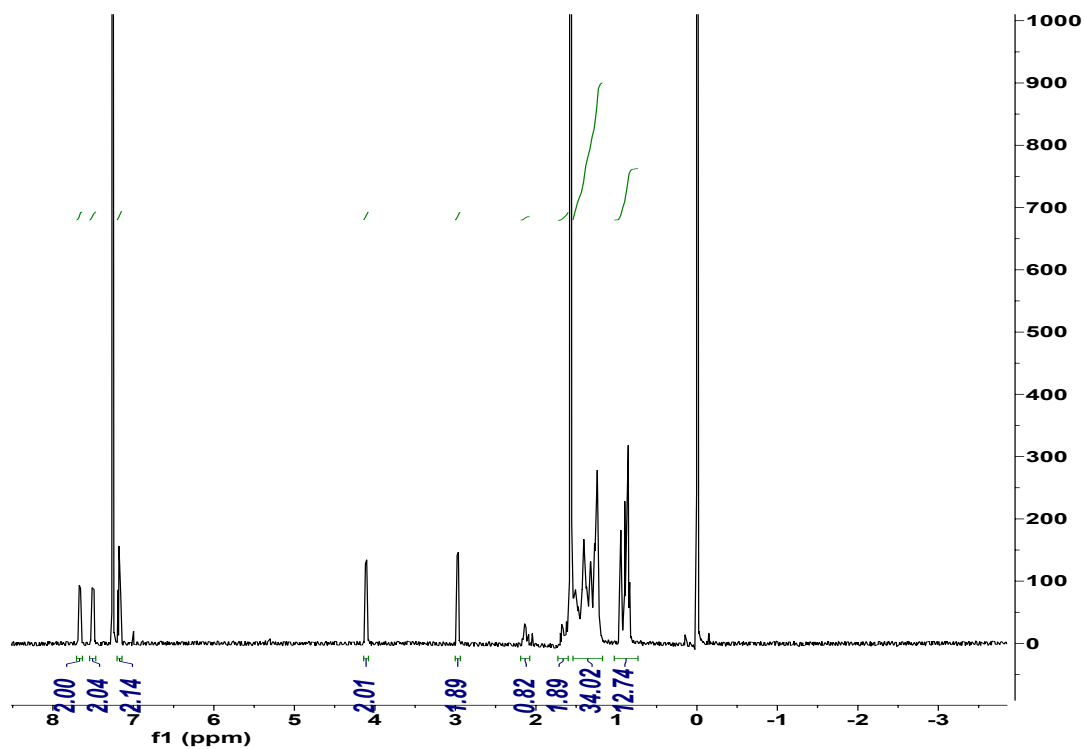

Fig S4. <sup>1</sup>H NMR spectrum of Compound 2a.

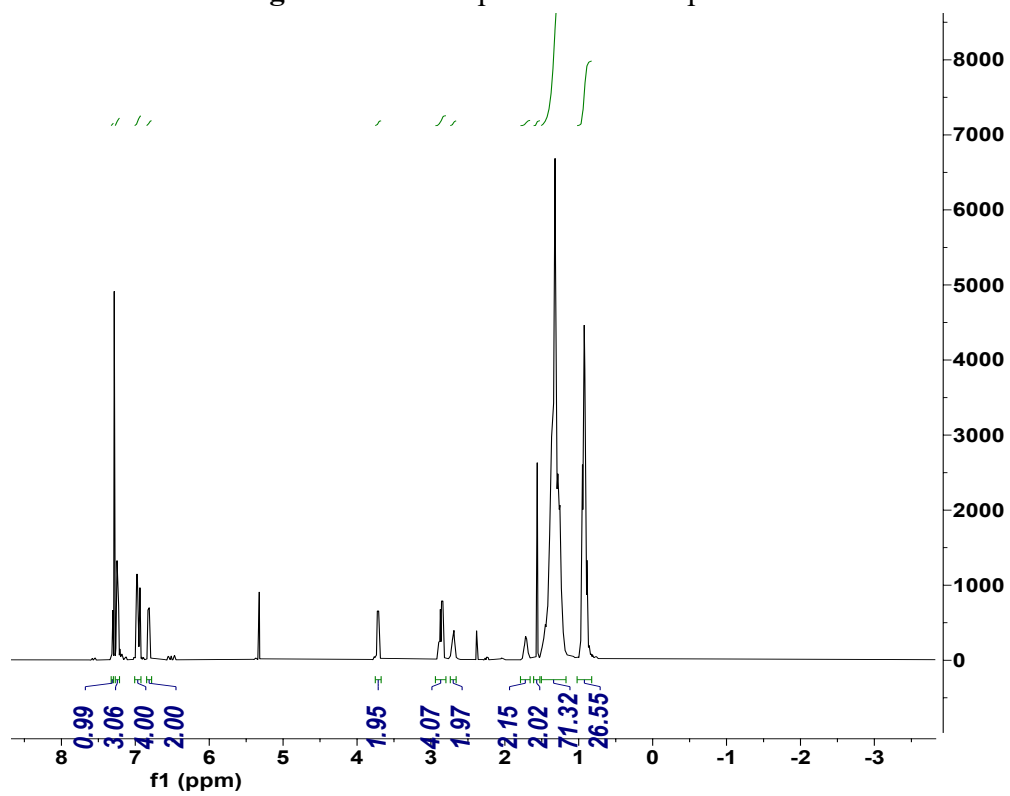

Fig S5. <sup>1</sup>H NMR spectrum of Compound 4a.

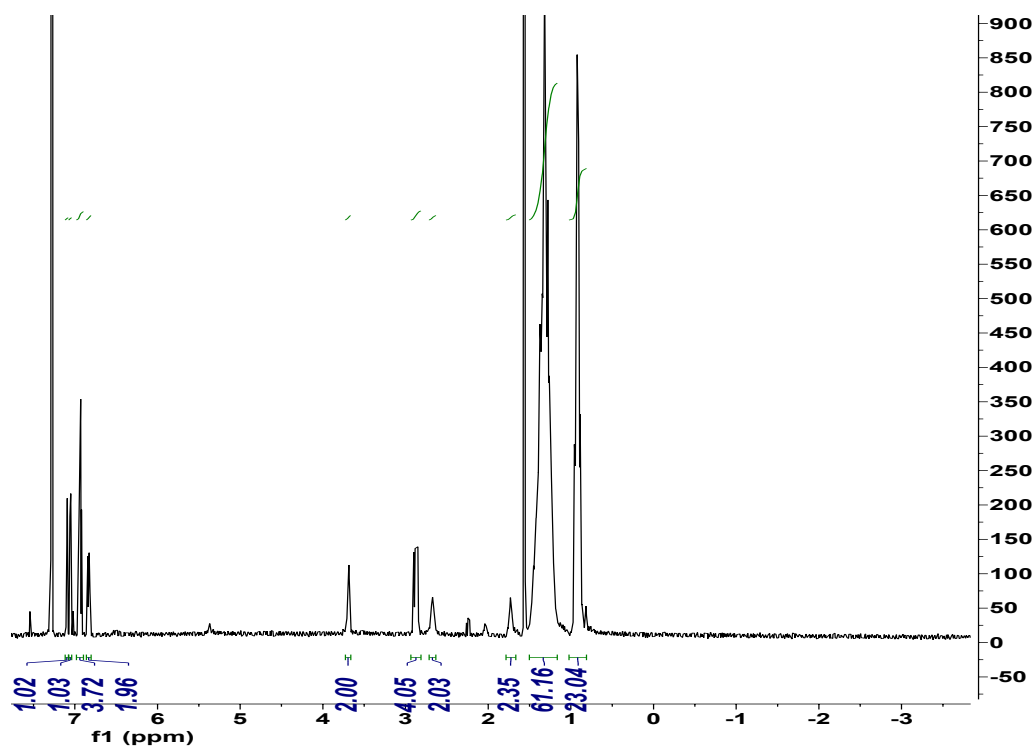

Fig S6. <sup>1</sup>H NMR spectrum of Compound 5a.

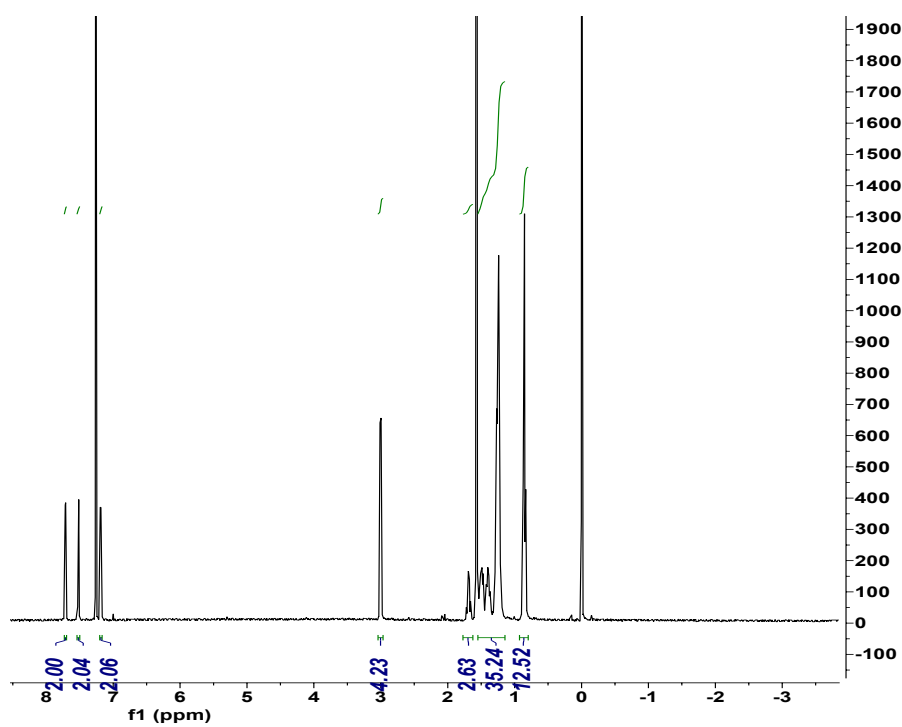

Fig S7. <sup>1</sup>H NMR spectrum of Compound 2b.

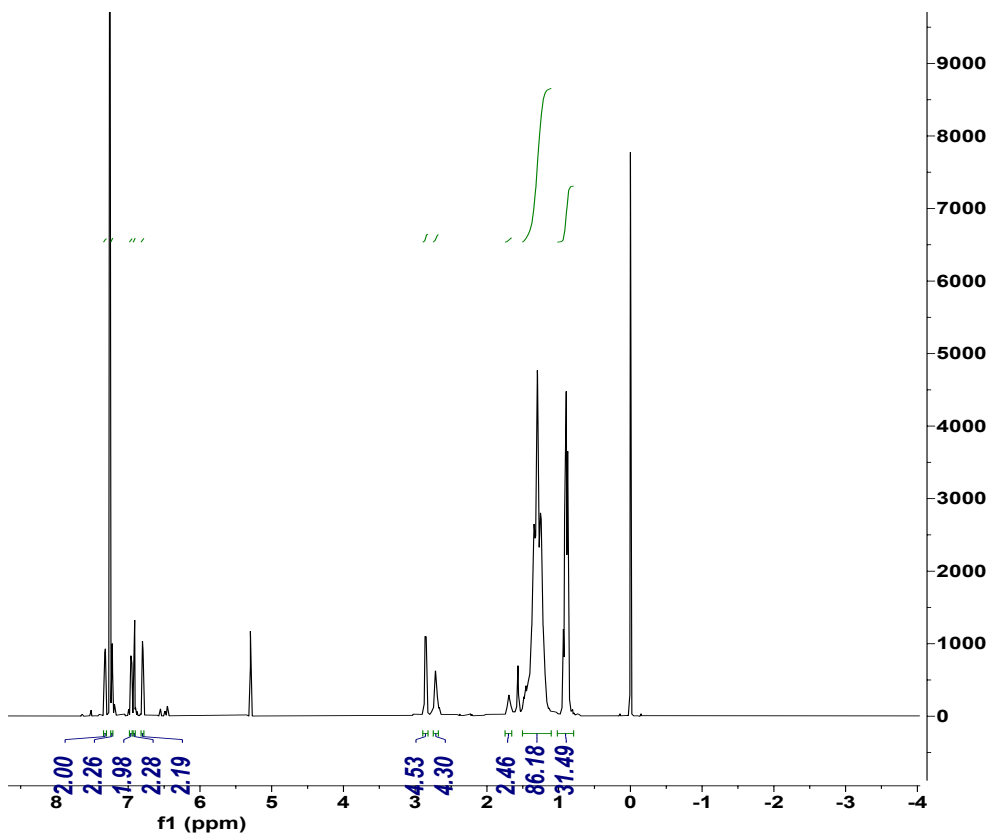

Fig S8.  $^1\text{H}$  NMR spectrum of Compound 4b.

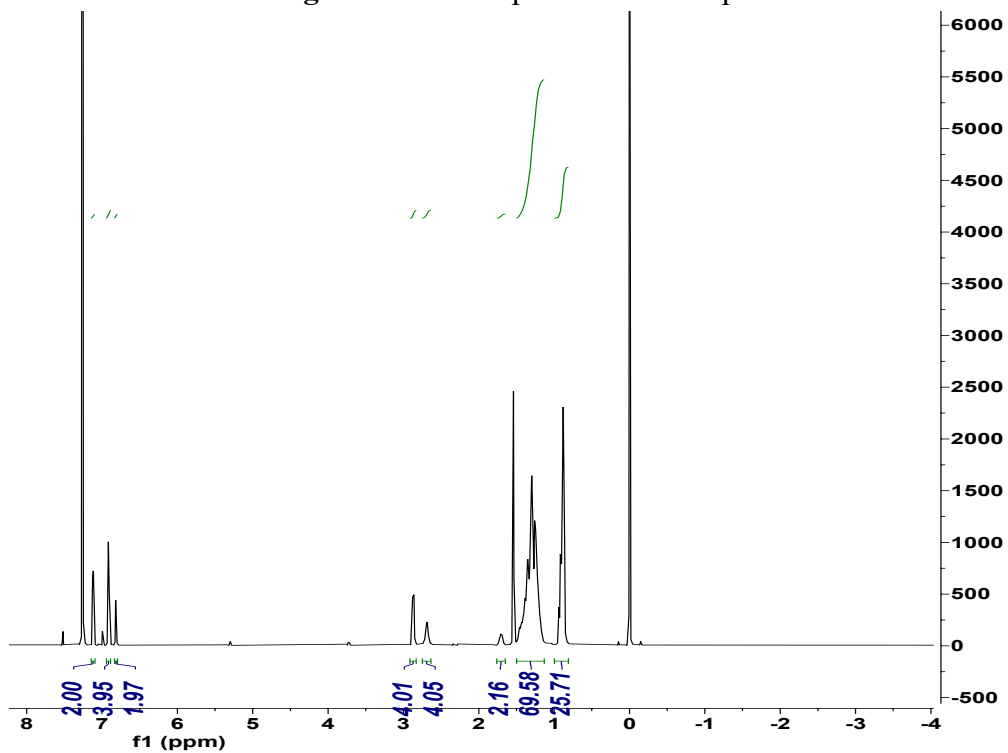

Fig S9.  $^1\text{H}$  NMR spectrum of Compound 5b.

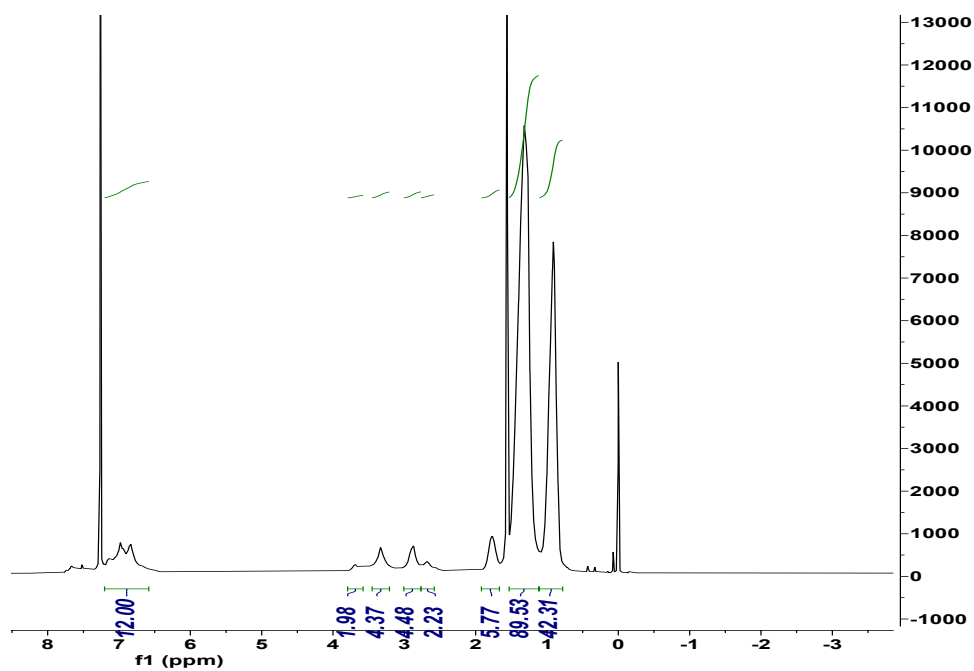

Fig S10. <sup>1</sup>H NMR spectrum of Polymer POS.

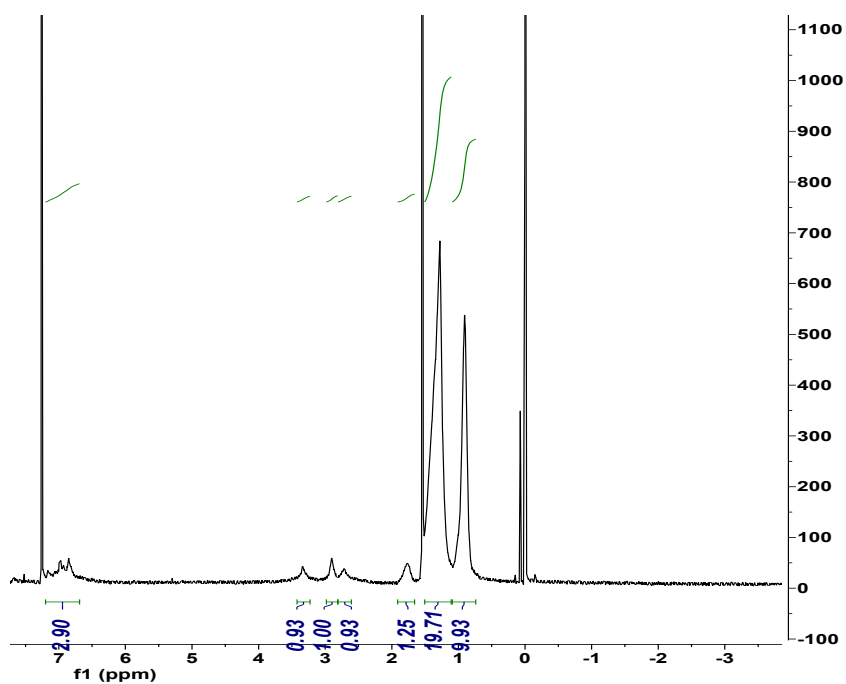

Fig S11. <sup>1</sup>H NMR spectrum of Polymer PSS.

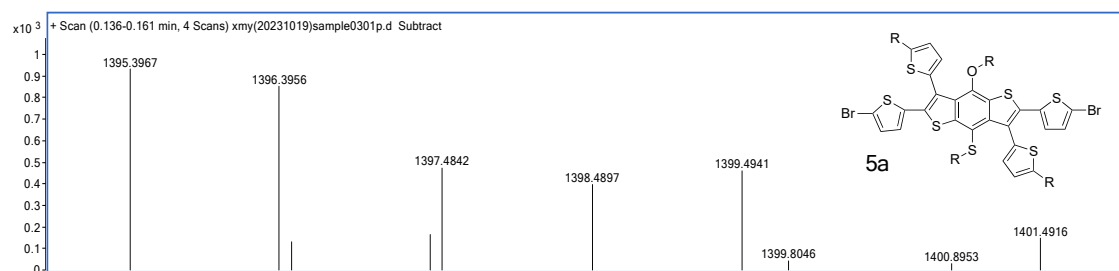

**Fig S12.** High resolution mass spectrum of Compound 5a.

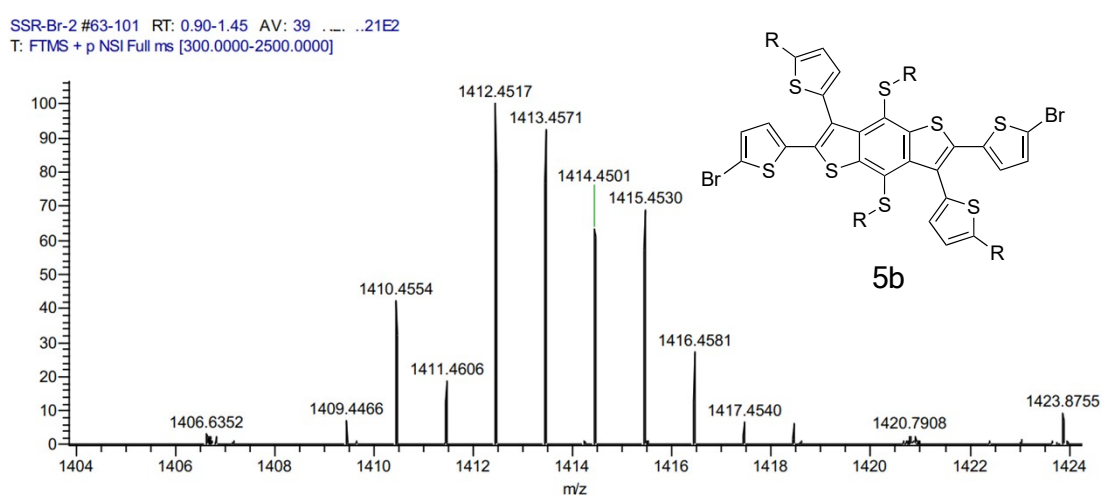

**Fig S13.** High resolution mass spectrum of Compound 5b.

## References

- S1. Y. S. Huang, F. Wu, M. Zhang, S. L. Mei, P. Shen and S. T. Tan, *Dyes Pigm.*, 2015, 115, 58-66.
- S2. D. Lee, S. W. Stone and J. P. Ferraris, *Chem. Commun.*, 2011, 47, 10987-10989.
- S3. P. Y. Gu, J. Zhang, G. K. Long, Z. L. Wang and Q. C. Zhang, *J. Mater. Chem. C*, 2016, 4, 3809-3814.
